# Supplementary material
Source: PubMed Central journal article supplement (PMC2860382)
Supplement: NIHMS190287-supplement-supplement_1.pdf [file NIHMS190287-supplement-supplement_1.pdf]

## SUPPLEMENTARY MATERIAL

### MATERIALS AND METHODS

#### *Human Subjects*

The Diabetes Heart Study (DHS) is an affected sib-pair study of subclinical atherosclerosis and its risk factors, consisting of families with two or more siblings with a diagnosis of T2D and lacking advanced renal insufficiency. Additional diabetic or non-diabetic siblings were also recruited when available. Ascertainment and recruitment have been described previously<sup>1,2</sup>. T2D was defined clinically as diabetes developing after the age of 35 years treated with insulin and/or oral agents, in the absence of historical evidence of ketoacidosis. The analyses here are restricted to 780 European-American sib-pairs with T2D from 375 families.

Protocols were approved by the Institutional Review Board of Wake Forest University School of Medicine, and all participants gave informed consent. Participant examinations were conducted in the General Clinical Research Center at Wake Forest University Baptist Medical Center, and included interviews for medical history, health behaviors, anthropometric measures, resting blood pressure, fasting total cholesterol, electrocardiography and spot urine collection. Common carotid artery intima-media thickness (IMT) was measured by high-resolution B-mode ultrasonography with a 7.5-MHz transducer and a Biosound Esaote (AU5) ultrasound machine as previously described<sup>2</sup>. Measurements were obtained using a well established protocol at Wake Forest University Baptist Medical Center, with correlations of repeat exams in the range of 0.88<sup>3</sup>.

#### *Isolation of Human Genomic DNA and Genotyping*

Total genomic DNA was purified from whole blood samples obtained from subjects using the PUREGENE DNA isolation kit (Gentra, Inc.). DNA concentration was quantified using standardized fluorometric readings on a Hoefer DyNA Quant 200 fluorometer (Hoefer Pharmacia Biotech Inc.). Each sample was diluted to a final concentration of five ng/ $\mu$ l. Genotypes were determined using a MassARRAY SNP Genotyping System (Sequenom Inc.)<sup>4</sup>. This genotyping system uses single-base extension reactions to create allele-specific products that are separated and scored in a matrix-assisted laser desorption ionization/time of flight mass spectrometer. Primers for PCR reactions were designed using the MassARRAY Assay Design Software (Sequenom Inc.). Sequences are available by request.

#### *Statistical Analysis of Human Genomic Data*

Maximum likelihood allele and genotype frequencies for each tagSNP were calculated from unrelated probands and were tested for departures from Hardy-Weinberg equilibrium using both  $\chi^2$  and exact tests. Estimates of linkage disequilibrium between tagSNPs were determined by calculating pairwise  $D'$  and  $r^2$  statistics in unrelated individuals. In the DHS, approximately 400 microsatellite markers from a 10 cM genome-wide linkage scan were used to examine and correct self-reported familial relationships using PREST (Pedigree Relationship Statistical Test)<sup>1,5</sup>. These 'corrected' sib-pair families were used for the current statistical genetic analyses.

All analyses were performed using variance components approaches as implemented in Merlin<sup>6</sup>. The primary analysis is the test of association between *each* ID3 tagSNP and IMT. Each tagSNP was tested for association in a model that included age, sex, BMI, systolic blood pressure, LDL and HDL as covariates, incorporating a variance component into the model to account for correlation between relatives due to familial resemblance. After identifying the most strongly associated tagSNP (with  $p < 0.05$ ) independent of covariates, a second analysis was performed that included the original covariates and the associated SNP to re-evaluate the evidence for association at all other tagSNPs. Phenotypes included in these analyses were transformed to approximate conditional normality to reduce heterogeneity of residual phenotypic variance across SNP genotypes. Because of the strong evidence for a role of Id3 in atherosclerosis in our previous studies, these studies were considered hypothesis-based tests and therefore no further adjustments were made.

### *Analysis of Id3 Expression of Id3105A vs Id3105T*

Plasmid constructs expressing products of the ancestral (Id3105A) and variant (Id3105T) alleles of *ID3* were generated as detailed in the expanded methods section of the online data supplement. NIH3T3 fibroblast cells ( $2.3 \times 10^5$  per dish) were plated in 60 mm dishes 24 hours prior to transfection. Cells were transiently transfected with 0.6  $\mu$ g of the Id3 plasmid (either the Id3105A or Id3105T construct) or 0.6  $\mu$ g of GFP plasmid using the Effectene Transfection Reagent (Qiagen). Forty-eight hours after transfection, cells were collected by trypsinization, lysed and immunoblotted as previously described<sup>7</sup> (see supplementary data). Membranes were probed with a rabbit monoclonal antibody against Id3 (CalBIO), then stripped and re-probed with a rabbit polyclonal antibody against ShBle (InVivoGEN). Experimental findings were repeated three times in triplicate. Densitometric analysis was performed and statistical significance was determined using an unpaired t-test.

### *Co-immunoprecipitation*

E12, Id3105A, Id3105T and ITF2B constructs were generated as described in the expanded methods section of the online data supplement. NIH3T3 cells ( $6 \times 10^5$  per dish) were plated in 10 cm dishes 24 hours prior to transfection. Cells were transfected with 1.0  $\mu$ g of FLAG-E12 and 0.3  $\mu$ g of Id3105A or Id3105T using the Effectene Transfection Reagent (Qiagen). Forty-eight hours after transfection, cells were trypsinized, washed in PBS and harvested in 500  $\mu$ l lysis buffer. Twenty-five  $\mu$ l of Gamma Bind G Sepharose beads (GE Healthcare) were incubated for 60 minutes with 1  $\mu$ g of a monoclonal Id3 antibody generated by our laboratory. Co-immunoprecipitation and immunoblotting were then carried out as described previously and in the online data supplement<sup>7</sup>. Membranes were probed with monoclonal antibodies against FLAG (Sigma) or Id3 (CalBIO). Experimental findings were repeated in triplicate. Quantitative densitometric analysis was performed and the ratio of binding was determined as previously described<sup>8,9</sup>. Statistical significance was determined using an unpaired t-test.

### *Promoter-Reporter Studies*

Smooth muscle alpha actin (SMaA) promoter reporter constructs have been described previously<sup>10,11</sup>. NIH3T3 fibroblast cells ( $6 \times 10^4$  per well) were plated in 6-well plates 24 hours prior to transfection. Cells were transiently transfected with 0.15  $\mu$ g of smooth muscle alpha actin promoter-chloramphenicol acetyltransferase reporter construct (pCAT-SMaA) along with 2.7  $\mu$ g of expression vectors (pEF4 empty vector, pEF4-FLAG-E12, pEF4-Id3105A or pEF4-Id3105T) using the FUGENE HD transfection reagent (Roche). Thirty-six hours after transfection, cells were lysed and assayed for chloramphenicol acetyltransferase (CAT) activity using a CAT ELISA kit as per the manufacturer's instructions (Roche). Protein content of individual samples was quantitated using a BioRad D<sub>c</sub> Protein Assay and CAT values were normalized to protein. Additional replicate wells were harvested in parallel for Western blotting, which was carried out as above.

### *Microarray assays*

Primary mouse aortic VSMCs were harvested as previously described<sup>12</sup>. Sample preparation and analysis were performed by the UVA GeneChip/Microarray Bioinformatics Facility. RNA was extracted and treated with DNase I. cDNA synthesis, labeling and array hybridization were carried out according to Affymetrix instructions (Affymetrix, Santa Clara, CA). Fold changes and p-values for sample comparisons were derived from the Microarray Analysis Suite (MAS v5.0) data analysis tool, invoking the Mann-Whitney nonparametric method. After confirmation of data quality, data sets were imported into Ingenuity Pathway Analysis software (Ingenuity Systems, Mountain View, CA) and biological pathways were analyzed. Differentially expressed genes that had a p-value less than 0.05 and a fold-change greater than or equal to 2.0 were not labeled as "absent" in microarray analysis for both groups and were included in the data analysis. Significant association of microarray data with cellular pathways was assessed as previously described<sup>13</sup>. Genes in pathways known to be involved in atherogenesis

(adhesion, immune trafficking, apoptosis, proliferation, and movement) that were significantly associated with our uploaded microarray data were then further analyzed for fold-change and significance.

#### *Animal Subjects*

All animal experiments were approved by the Animal Care and Use Committee at the University of Virginia. *Id3<sup>+/+</sup>ApoE<sup>-/-</sup>* mice were purchased from Jackson laboratories (stock #002052). *Id3<sup>-/-</sup>* mice, a generous gift from Dr. Yuan Zhuang at Duke University, were backcrossed to C57BL/6 mice and purity of the resulting line was confirmed to be >99% based on microsatellite analysis. These mice were then bred onto the *ApoE<sup>-/-</sup>* background to create the *Id3<sup>-/-</sup>ApoE<sup>-/-</sup>* mice used in these studies. All mice were housed in microisolator cages in a pathogen-free facility. All mice were given water *ad libitum* and either a standard chow diet (Harlan Teklad #7012) or Western diet (Harlan Teklad #TD88137).

#### *Assessment of Atherosclerosis in Mice*

Beginning at eight to ten weeks of age, *Id3<sup>+/+</sup>ApoE<sup>-/-</sup>* and *Id3<sup>-/-</sup>ApoE<sup>-/-</sup>* mice were fed a Western diet for 16 or 32 weeks. Control animals were continued on a standard chow diet and euthanized after 16 or 32 weeks. Animals were anesthetized by intraperitoneal injection of ketamine/xylazine and the vasculature was perfused by left ventricular puncture using 4% paraformaldehyde. Aortic arch segments were embedded in paraffin and 5  $\mu$ m thick serial sections were generated from the aortic valve to the bifurcation of the brachiocephalic artery in each animal. Sections were stained at 150  $\mu$ m intervals using the Movat method<sup>14</sup> and plaque volume was assessed using ImagePro 5.0 software. Descending aortas were opened longitudinally, pinned and stained using Sudan IV as previously described<sup>15</sup>. Aortas were then imaged and lesion area was quantified using ImagePro 5.0. For analysis of plaque composition, three 5  $\mu$ m cross sections per animal were stained by the Movat method. Areas that were non-nucleated and lacked the green mucin stain were considered acellular. Nucleated and mucin positive areas were considered cellular. These areas were measured using ImagePro software. Statistical significance was determined using a Mann-Whitney U-test.

#### *Measurement of Serum Parameters in Mice*

Glucose measurements were obtained from whole blood by tail snip using an AccuCheck Advantage glucometer. Lipid values were assayed from sera acquired at the time of sacrifice. Insulin levels were determined by radioimmunoassay (catalog #SRI-13K, Millipore). Statistical significance was determined using the Mann-Whitney U test.

## SUPPLEMENTARY FIGURES AND TABLES

**Supplementary Table I. Patient Characteristics in the Diabetes Heart Study.**

| Variables                                               | Overall<br>(n=780) |
|---------------------------------------------------------|--------------------|
| Age (years)                                             | 61.80 ± 9.20       |
| Men (46.5%)                                             |                    |
| Age (years)                                             | 62.50 ± 9.0        |
| Women (53.5%)                                           |                    |
| Age (years)                                             | 61.30 ± 9.3        |
| Post-menopausal (%)                                     | 89.70              |
| Hormone replacement therapy (%)                         | 26.10              |
| BMI (kg/m <sup>2</sup> )                                | 32.40 ± 6.80       |
| Systolic BP (mm Hg)                                     | 139.8 ± 19.0       |
| Diastolic BP (mm Hg)                                    | 72.80 ± 10.2       |
| Current smoker (%)                                      | 16.30              |
| Past smoker (%)                                         | 42.70              |
| Pack years                                              | 21.50 ± 29.2       |
| Lipid lowering medication (%)                           | 44.70              |
| HDL (mg/dl)                                             | 42.70 ± 12.2       |
| LDL (mg/dl)                                             | 104.1 ± 32.4       |
| Triglycerides (mg/dl)                                   | 214.2 ± 145        |
| HbA1c (%)                                               | 7.600 ± 1.80       |
| Fasting glucose (mg/dl)                                 | 149.8 ± 57.0       |
| IMT                                                     | 0.680 ± 0.13       |
| <br><i>Measures restricted to persons with diabetes</i> |                    |
| Duration of diabetes (years)                            | 10.2 ± 6.9         |
| Treatment for diabetes                                  |                    |
| Insulin (%)                                             | 26.20              |
| Oral hypoglycemic (%)                                   | 76.00              |

Values are the average ± standard deviation

**Supplementary Table II. Genes upregulated (> 4-fold) in *Id3*<sup>-/-</sup> smooth muscle cells.**

| <b>Affymetrix</b> | <b>Symbol</b> | <b>Entrez Gene Name</b>                                   | <b>Fold Change</b> | <b>p-value</b> |
|-------------------|---------------|-----------------------------------------------------------|--------------------|----------------|
| 1418945_at        | MMP3          | matrix metalloproteinase 3 (stromelysin 1, progelatinase) | 28.8               | 0.043          |
| 450782_at         | WNT4          | wingless-type MMTV integration site family, member 4      | 24.9               | 0.046          |
| 460238_at         | MSLN          | mesothelin                                                | 22.2               | 0.022          |
| 416200_at         | IL33          | interleukin 33                                            | 12.1               | 0.011          |
| 421404_at         | CXCL15        | chemokine (C-X-C motif) ligand 15                         | 11.0               | 0.018          |
| 418752_at         | ALDH3A1       | aldehyde dehydrogenase 3 family, member A1                | 8.96               | 0.041          |
| 1449070_x_at      | APCDD1        | adenomatous polyposis coli down-regulated 1               | 8.52               | 0.000          |
| 1426673_at        | CDH3          | cadherin 3, type 1, P-cadherin (placental)                | 8.10               | 0.007          |
| 1436448_a_at      | PTGS1         | prostaglandin-endoperoxide synthase 1                     | 7.53               | 0.006          |
| 1449865_at        | SEMA3A        | sema domain, immunoglobulin domain, (semaphorin) 3A       | 7.47               | 0.012          |
| 1422833_at        | FOXA2         | forkhead box A2                                           | 7.35               | 0.031          |
| 1418304_at        | PCDH21        | protocadherin 21                                          | 7.20               | 0.030          |
| 1422779_at        | SMPD3         | sphingomyelin phosphodiesterase 3, neutral membrane       | 6.81               | 0.015          |
| 1434599_a_at      | TJP2          | tight junction protein 2 (zona occludens 2)               | 6.12               | 0.014          |
| 1416382_at        | CTSC          | cathepsin C                                               | 4.97               | 0.002          |
| 1452014_a_at      | IGF1          | insulin-like growth factor 1 (somatomedin C)              | 5.79               | 0.012          |
| 1448688_at        | PODXL         | podocalyxin-like                                          | 5.26               | 0.034          |
| 1419328_at        | SEMA4F        | sema domain, immunoglobulin domain, (semaphorin) 4F       | 4.88               | 0.031          |
| 1448656_at        | CACNB3        | calcium channel, voltage-dependent, beta 3 subunit        | 4.64               | 0.046          |
| 1417301_at        | FZD6          | frizzled homolog 6 (Drosophila)                           | 4.57               | 0.040          |
| 1448831_at        | ANGPT2        | angiopoietin 2                                            | 4.30               | 0.021          |
| 1450850_at        | EZR           | ezrin                                                     | 4.27               | 0.009          |
| 1422789_at        | ALDH1A2       | aldehyde dehydrogenase 1 family, member A2                | 4.20               | 0.028          |
| 1451335_at        | PLAC8         | placenta-specific 8                                       | 4.02               | 0.005          |

**Supplementary Table III. Genes downregulated (> 4-fold) in *Id3*<sup>-/-</sup> smooth muscle cells.**

| <b>Affymetrix</b> | <b>Symbol</b> | <b>Entrez Gene Name</b>                                              | <b>Fold Change</b> | <b>p-value</b> |
|-------------------|---------------|----------------------------------------------------------------------|--------------------|----------------|
| 1419100_at        | SERPINA3      | serpin peptidase inhibitor, clade A member 3                         | -24.5              | 0.046          |
| 1460258_at        | LECT1         | leukocyte cell derived chemotaxin 1                                  | -14.9              | 0.032          |
| 1448742_at        | SNAI1         | snail homolog 1 (Drosophila)                                         | -13.5              | 0.012          |
| 1424007_at        | GDF10         | growth differentiation factor 10                                     | -13.2              | 0.001          |
| 1423294_at        | MEST          | mesoderm specific transcript homolog (mouse)                         | -13.2              | 0.003          |
| 1418666_at        | PTX3          | pentraxin-related gene, rapidly induced by IL-1 $\beta$              | -12.4              | 0.001          |
| 1432466_a_at      | APOE          | apolipoprotein E                                                     | -12.1              | 0.000          |
| 1427038_at        | PENK          | proenkephalin                                                        | -11.7              | 0.005          |
| 1419527_at        | COMP          | cartilage oligomeric matrix protein                                  | -10.1              | 0.010          |
| 1418061_at        | LTBP2         | latent transforming growth factor beta binding protein 2             | -9.50              | 0.042          |
| 1451537_at        | CHI3L1        | chitinase 3-like 1 (cartilage glycoprotein-39)                       | -8.49              | 0.003          |
| 1417917_at        | CNN1          | calponin 1, basic, smooth muscle                                     | -7.56              | 0.000          |
| 1419608_a_at      | MIA           | melanoma inhibitory activity                                         | -7.53              | 0.008          |
| 1416855_at        | GAS1          | growth arrest-specific 1                                             | -7.43              | 0.003          |
| 1425582_a_at      | EMCN          | endomucin                                                            | -6.81              | 0.049          |
| 1419383_at        | S100B         | S100 calcium binding protein B                                       | -6.67              | 0.040          |
| 1449863_a_at      | DLX5          | distal-less homeobox 5                                               | -6.40              | 0.037          |
| 1421287_a_at      | PECAM1        | platelet/endothelial cell adhesion molecule                          | -6.28              | 0.026          |
| 1419309_at        | PDPN          | podoplanin                                                           | -6.09              | 0.009          |
| 1452072_at        | MYCT1         | myc target 1                                                         | -5.88              | 0.027          |
| 1449580_s_at      | HLA-DMB       | major histocompatibility complex, class II, DM beta                  | -5.74              | 0.016          |
| 1451538_at        | SOX9          | SRY (sex determining region Y)-box 9                                 | -5.62              | 0.013          |
| 1417936_at        | CCL9          | chemokine (C-C motif) ligand 9                                       | -5.46              | 0.028          |
| 1419589_at        | CD93          | CD93 molecule                                                        | -5.41              | 0.024          |
| 1433956_at        | CDH5          | cadherin 5, type 2 (vascular endothelium)                            | -5.39              | 0.022          |
| 1416287_at        | RGS4          | regulator of G-protein signaling 4                                   | -5.38              | 0.001          |
| 1449106_at        | GPX3          | glutathione peroxidase 3 (plasma)                                    | -5.24              | 0.006          |
| 1448950_at        | IL1R1         | interleukin 1 receptor, type I                                       | -5.17              | 0.049          |
| 1450440_at        | GFRA1         | GDNF family receptor alpha 1                                         | -5.09              | 0.031          |
| 1416321_s_at      | PRELP         | proline/arginine-rich end leucine-rich repeat protein                | -4.97              | 0.010          |
| 1425457_a_at      | GRB10         | growth factor receptor-bound protein 10                              | -4.96              | 0.035          |
| 1424131_at        | COL6A3        | collagen, type VI, alpha 3                                           | -4.95              | 0.040          |
| 1448169_at        | KRT18         | keratin 18                                                           | -4.94              | 0.016          |
| 1423428_at        | ROR2          | receptor tyrosine kinase-like orphan receptor 2                      | -4.87              | 0.018          |
| 1426032_at        | NFATC2        | nuclear factor of activated T-cells, cytoplasmic, 2                  | -4.75              | 0.038          |
| 1417359_at        | MFAP2         | microfibrillar-associated protein 2                                  | -4.52              | 0.008          |
| 1416006_at        | MDK           | midkine (neurite growth-promoting factor 2)                          | -4.46              | 0.002          |
| 1450325_at        | ANGPT4        | angiopoietin 4                                                       | -4.44              | 0.026          |
| 1451331_at        | PPP1R1B       | protein phosphatase 1, regulatory (inhibitor) subunit 1B             | -4.35              | 0.045          |
| 1448136_at        | ENPP2         | ectonucleotide pyrophosphatase/phosphodiesterase 2                   | -4.28              | 0.004          |
| 1450509_at        | CHST11        | carbohydrate (chondroitin 4) sulfotransferase 11                     | -4.11              | 0.018          |
| 1448862_at        | ICAM2         | intercellular adhesion molecule 2                                    | -4.06              | 0.023          |
| 1420377_at        | ST8SIA2       | ST8 $\alpha$ -N-acetyl-neuraminide $\alpha$ -2,8-sialyltransferase 2 | -4.04              | 0.018          |

**Supplementary Table IV. Average random plasma lipid, glucose and insulin profiles of *Id3*<sup>+/+</sup> *ApoE*<sup>-/-</sup> and *Id3*<sup>-/-</sup> *ApoE*<sup>-/-</sup> mice.**

|                           | <i>Id3</i> <sup>+/+</sup> <i>ApoE</i> <sup>-/-</sup> | <i>Id3</i> <sup>-/-</sup> <i>ApoE</i> <sup>-/-</sup> | p-value   |
|---------------------------|------------------------------------------------------|------------------------------------------------------|-----------|
| <b><i>Chow Fed</i></b>    |                                                      |                                                      |           |
| Weight (g)                | 31.89 ± 0.42                                         | 30.90 ± 0.77                                         | n.s.      |
| Total cholesterol (mg/dL) | 535 ± 36                                             | 512 ± 46                                             | n.s.      |
| LDL (mg/dL)               | 481 ± 33                                             | 360 ± 45                                             | n.s.      |
| HDL (mg/dl)               | 31 ± 2                                               | 33 ± 3                                               | n.s.      |
| Triglycerides (mg/dL)     | 136 ± 15                                             | 121 ± 15                                             | n.s.      |
| Glucose (mg/dL)           | 129 ± 9                                              | 137 ± 9                                              | n.s.      |
| Insulin (ng/mL)           | 0.96 ± 0.17                                          | 1.00 ± 0.20                                          | n.s.      |
| <b><i>Western Fed</i></b> |                                                      |                                                      |           |
| Weight (g)                | 35.76 ± 1.60                                         | 33.33 ± 1.83                                         | n.s.      |
| Total cholesterol (mg/dL) | 1553 ± 184                                           | 1480 ± 188                                           | n.s.      |
| LDL (mg/dL)               | 1492 ± 176                                           | 1426 ± 190                                           | n.s.      |
| HDL (mg/dl)               | 23 ± 2                                               | 25 ± 4                                               | n.s.      |
| Triglycerides (mg/dL)     | 216 ± 43                                             | 174 ± 22                                             | n.s.      |
| Glucose (mg/dL)           | 159 ± 6                                              | 138 ± 5                                              | p < 0.008 |
| Insulin (ng/mL)           | 2.38 ± 0.49                                          | 3.20 ± 0.83                                          | n.s.      |

Values are the average ± standard deviation  
n.s.: not significant

## SUPPLEMENTARY REFERENCES

1. Bowden DW, Rudock M, Ziegler J, Lehtinen AB, Xu J, Wagenknecht LE, Herrington D, Rich SS, Freedman BI, Carr JJ, Langefeld CD. Coincident linkage of type 2 diabetes, metabolic syndrome, and measures of cardiovascular disease in a genome scan of the diabetes heart study. *Diabetes*. 2006;55:1985-1994.
2. Lange LA, Bowden DW, Langefeld CD, Wagenknecht LE, Carr JJ, Rich SS, Riley WA, Freedman BI. Heritability of carotid artery intima-medial thickness in type 2 diabetes. *Stroke; a journal of cerebral circulation*. 2002;33:1876-1881.
3. Bots ML, Evans GW, Riley W, McBride KH, Paskett ED, Helmond FA, Grobbee DE. The effect of tibolone and continuous combined conjugated equine oestrogens plus medroxyprogesterone acetate on progression of carotid intima-media thickness: the Osteoporosis Prevention and Arterial effects of tiboLone (OPAL) study. *European heart journal*. 2006;27:746-755.
4. Oeth P, Beaulieu M, Park C, Kosman D, del Mistro G, van den Boom D, Jurinke C. iPLEX assay: Increased Plexing Efficiency and Flexibility for MassARRAY System Through Single Base Primer Extension with Mass-modified Terminators. *Sequenom Application Note*. 2005.
5. McPeck MS, Sun L. Statistical tests for detection of misspecified relationships by use of genome-screen data. *Am J Hum Genet*. 2000;66:1076-1094.
6. Abecasis GR, Cherny SS, Cookson WO, Cardon LR. Merlin--rapid analysis of dense genetic maps using sparse gene flow trees. *Nat Genet*. 2002;30:97-101.
7. Doran AC, Meller N, Cutchins A, Deliri H, Slayton RP, Oldham SN, Kim JB, Keller SR, McNamara CA. The helix-loop-helix factors Id3 and E47 are novel regulators of adiponectin. *Circulation research*. 2008;103:624-634.
8. Meller N, Irani-Tehrani M, Kiosses WB, Del Pozo MA, Schwartz MA. Zizimin1, a novel Cdc42 activator, reveals a new GEF domain for Rho proteins. *Nature cell biology*. 2002;4:639-647.
9. Meller N, Irani-Tehrani M, Ratnikov BI, Paschal BM, Schwartz MA. The novel Cdc42 guanine nucleotide exchange factor, zizimin1, dimerizes via the Cdc42-binding CZH2 domain. *The Journal of biological chemistry*. 2004;279:37470-37476.
10. Jung F, Johnson AD, Kumar MS, Wei B, Hautmann M, Owens GK, McNamara C. Characterization of an E-box-dependent cis element in the smooth muscle alpha-actin promoter. *Arteriosclerosis, thrombosis, and vascular biology*. 1999;19:2591-2599.
11. Kumar MS, Hendrix JA, Johnson AD, Owens GK. Smooth muscle alpha-actin gene requires two E-boxes for proper expression in vivo and is a target of class I basic helix-loop-helix proteins. *Circulation research*. 2003;92:840-847.
12. Forrest ST, Taylor AM, Sarembock IJ, Perlegas D, McNamara CA. Phosphorylation regulates Id3 function in vascular smooth muscle cells. *Circulation research*. 2004;95:557-559.
13. Yuan Z, Miyoshi T, Bao Y, Sheehan JP, Matsumoto AH, Shi W. Microarray analysis of gene expression in mouse aorta reveals role of the calcium signaling pathway in control of atherosclerosis susceptibility. *American journal of physiology*. 2009;296:H1336-1343.
14. Movat HZ. Demonstration of all connective tissue elements in a single section; pentachrome stains. *A. M. A.* 1955;60:289-295.
15. Daugherty A, Whitman SC. Quantification of atherosclerosis in mice. *Methods Mol Biol*. 2003;209:293-309.
